# Supplementary material
Source: PubMed Central journal article supplement (PMC64951)

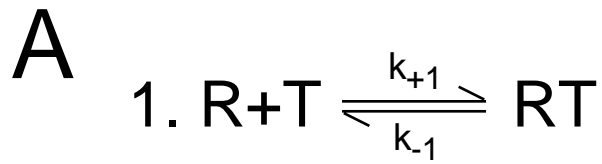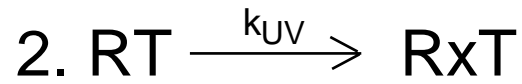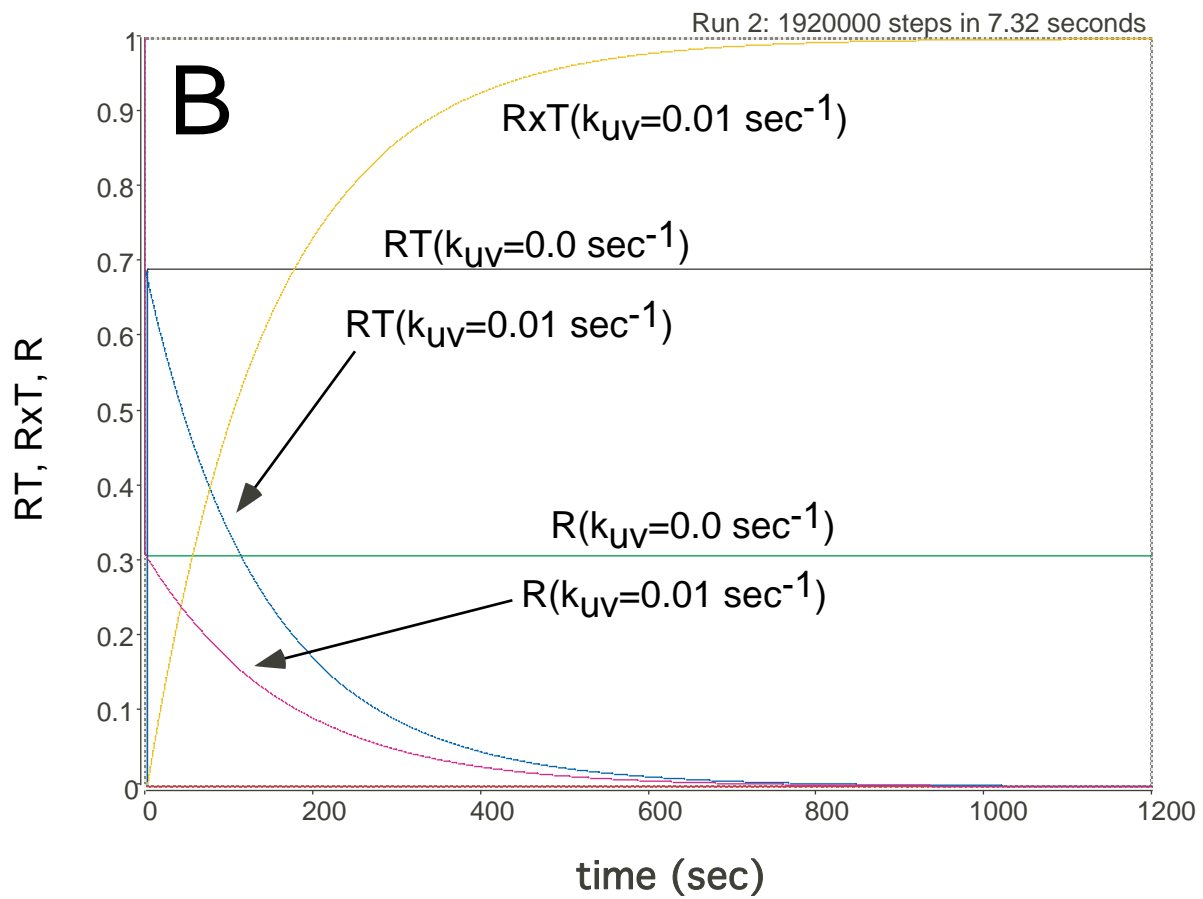

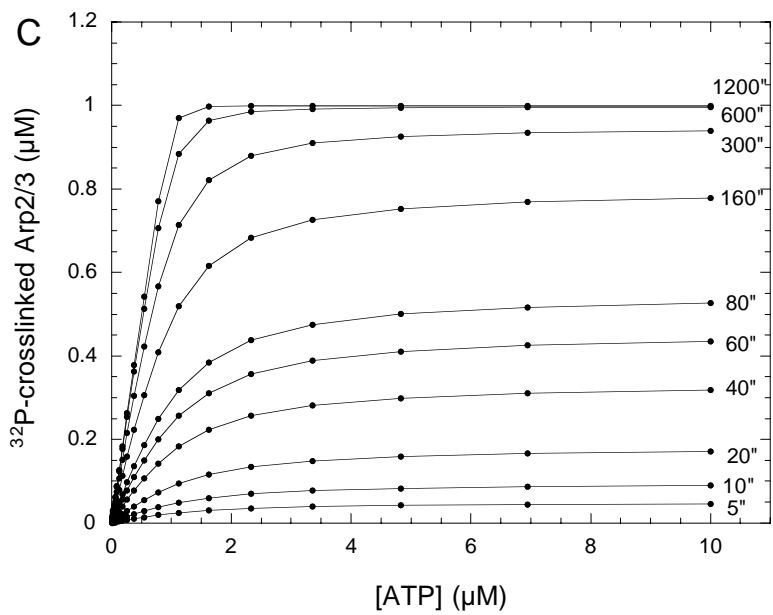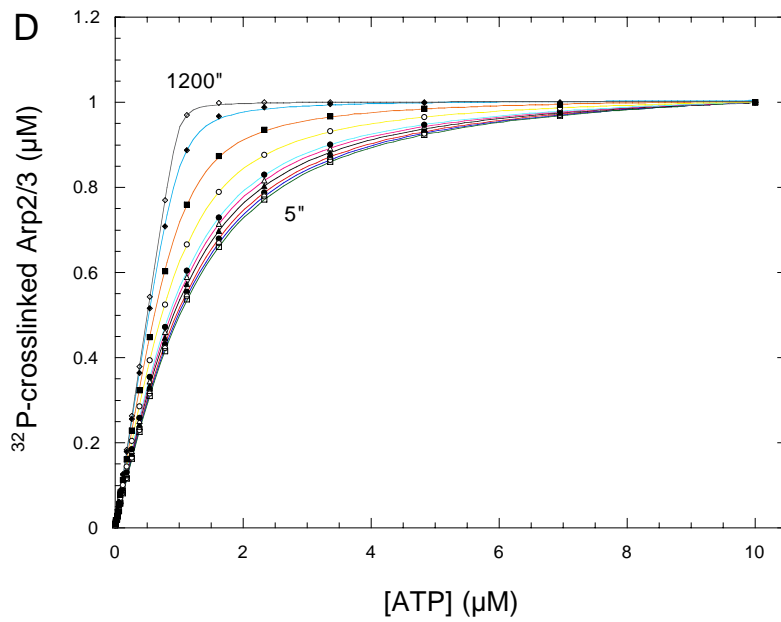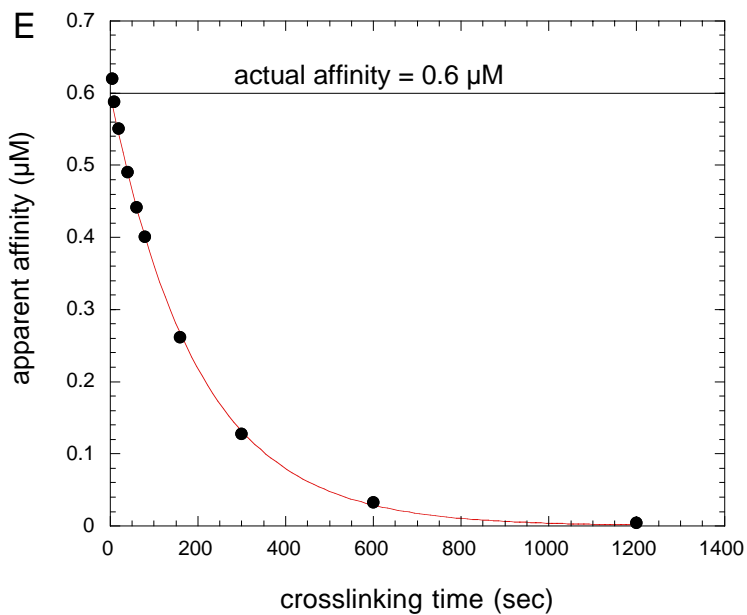

Supplement: pnas_98_26_14871__2.pdf [file pnas_98_26_14871__2.pdf]
